# Supplementary material for: Preparative isolation of maltol glycoside from Dianthus superbus and its anti-inflammatory activity in vitro
Source: Royal Society of Chemistry journal article supplement (doi:10.1039/d1ra07273k), 2022-01-01
Supplement: d1ra07273k1.pdf [file d1ra07273k1.pdf]

# **Preparative isolation of the maltol glycoside from *Dianthus superbus* and its anti-inflammatory activity *in vitro***

Chen Yuan<sup>a</sup>, Jun Dang<sup>b1</sup>, Yu Han<sup>a</sup>, Chuang Liu<sup>b</sup>, Song Yu<sup>c</sup>, Yue Lv<sup>a</sup>, Yunbin Cui<sup>d</sup>,  
Gang Li<sup>a\*</sup>

<sup>a</sup> Center for Mitochondria and Healthy Aging, College of Life Sciences, Yantai University, Yantai 264005, China

<sup>b</sup> Qinghai Provincial Key Laboratory of Tibetan Medicine Research, Key Laboratory of Tibetan Medicine Research, Northwest Institute of Plateau Biology, Chinese Academy of Sciences, Xining 810001, Qinghai, China

<sup>c</sup> College of Pharmacy, Qinghai University, Xining 810016, Qinghai, China

<sup>d</sup> College of Life Sciences, Qinghai Normal University, Xining 810016, Qinghai, China

---

**\*Correspondence:** Center for Mitochondria and Healthy Aging, College of Life Sciences, Yantai University, Yantai 264005, China

**E-mail:** ligang@ytu.edu.cn (Gang Li)

**Fax/Phone number:** +86-535-6902638

<sup>1</sup>These authors contributed equally to this work

## Table of Contents

|                                                                                                                                            |    |
|--------------------------------------------------------------------------------------------------------------------------------------------|----|
| Figure S1. ESI mass spectrum of tunicoside B .....                                                                                         | 3  |
| Figure S2. <sup>1</sup> H NMR Spectrum (600 MHz) of tunicoside B (in MeOH- <i>d</i> <sub>4</sub> ) .....                                   | 4  |
| Figure S3. <sup>13</sup> C NMR Spectrum (151 MHz) of tunicoside B (in MeOH- <i>d</i> <sub>4</sub> ).....                                   | 5  |
| Figure S4. Optical rotations of tunicoside B.....                                                                                          | 6  |
| Figure S5. Ultraviolet (UV) spectra of tunicoside B .....                                                                                  | 7  |
| Figure S6. IR spectra of tunicoside B .....                                                                                                | 8  |
| Figure S7. The western blot images and the photographs of the corresponding pieces of membrane of iNOS (two independent experiments) ..... | 9  |
| Figure S8. The western blot images and the photographs of the corresponding pieces of membrane of GAPDH (two independent experiments)..... | 10 |

Figure S1. ESI mass spectrum of tunicoside B

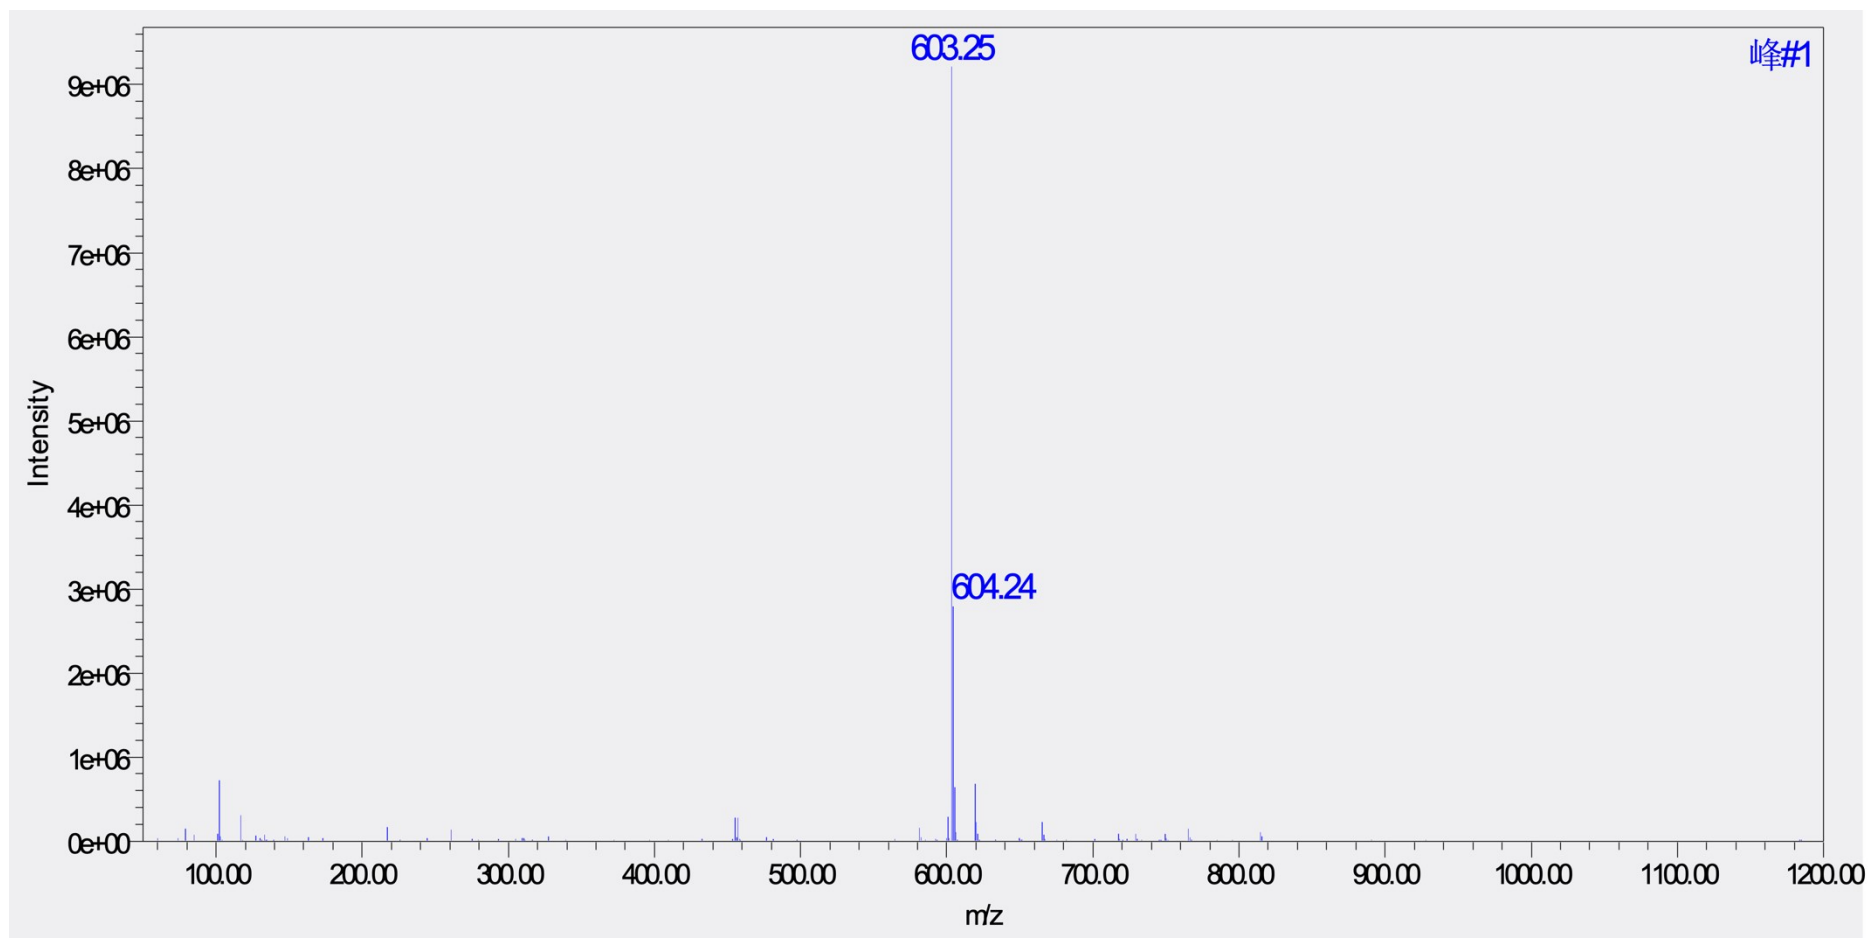

Figure S2. <sup>1</sup>H NMR Spectrum (600 MHz) of tunicoside B (in MeOH-*d*<sub>4</sub>)

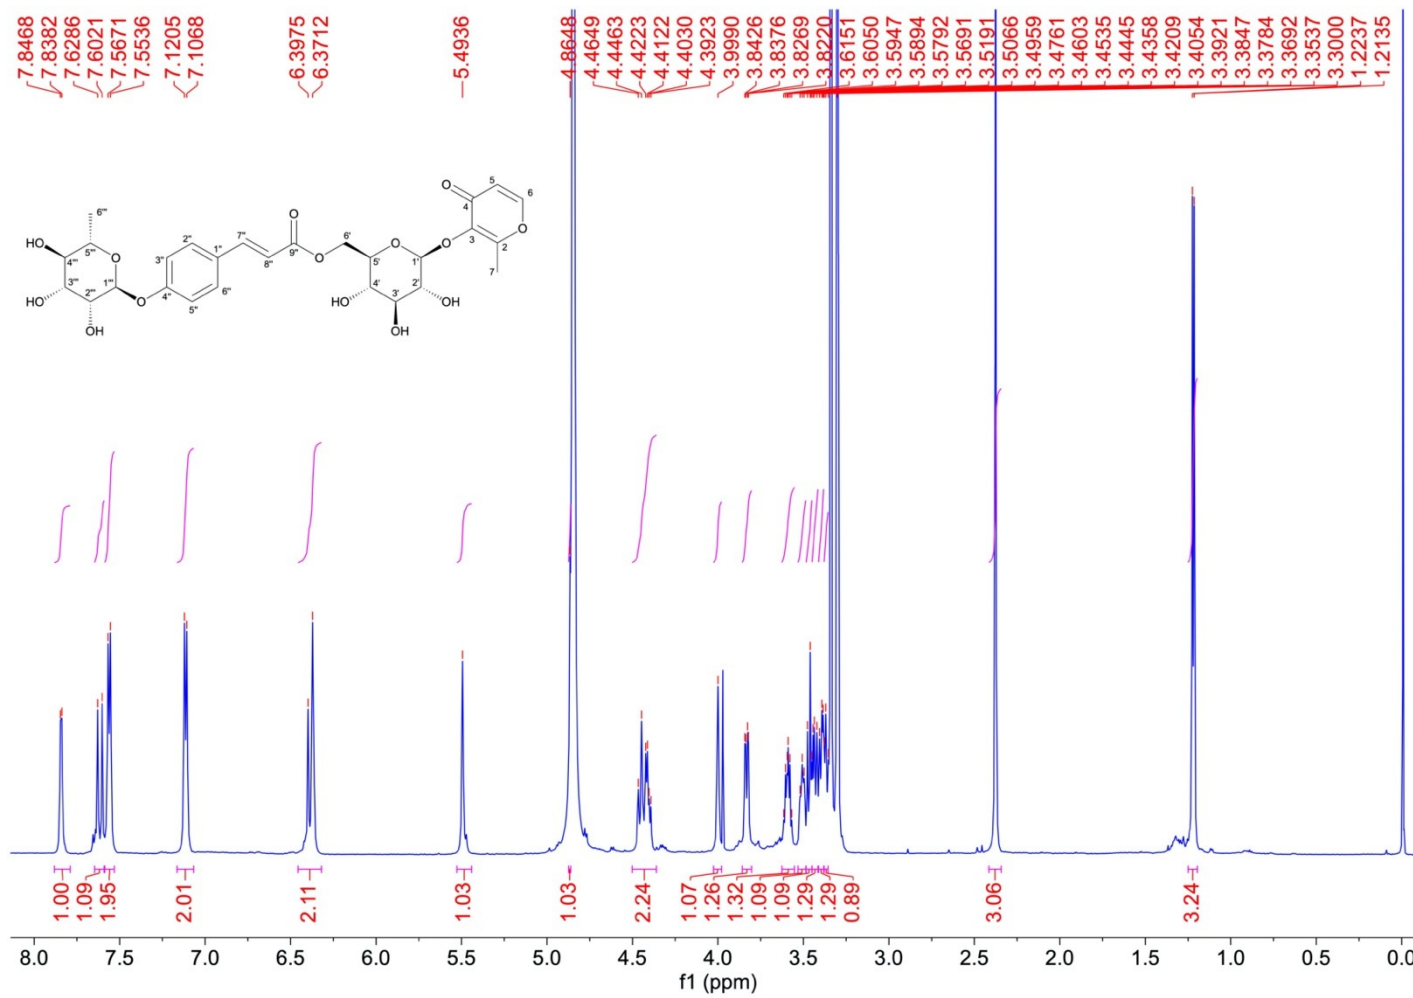

Figure S3.  $^{13}\text{C}$  NMR Spectrum (151 MHz) of tunicoside B (in  $\text{MeOH-}d_4$ )

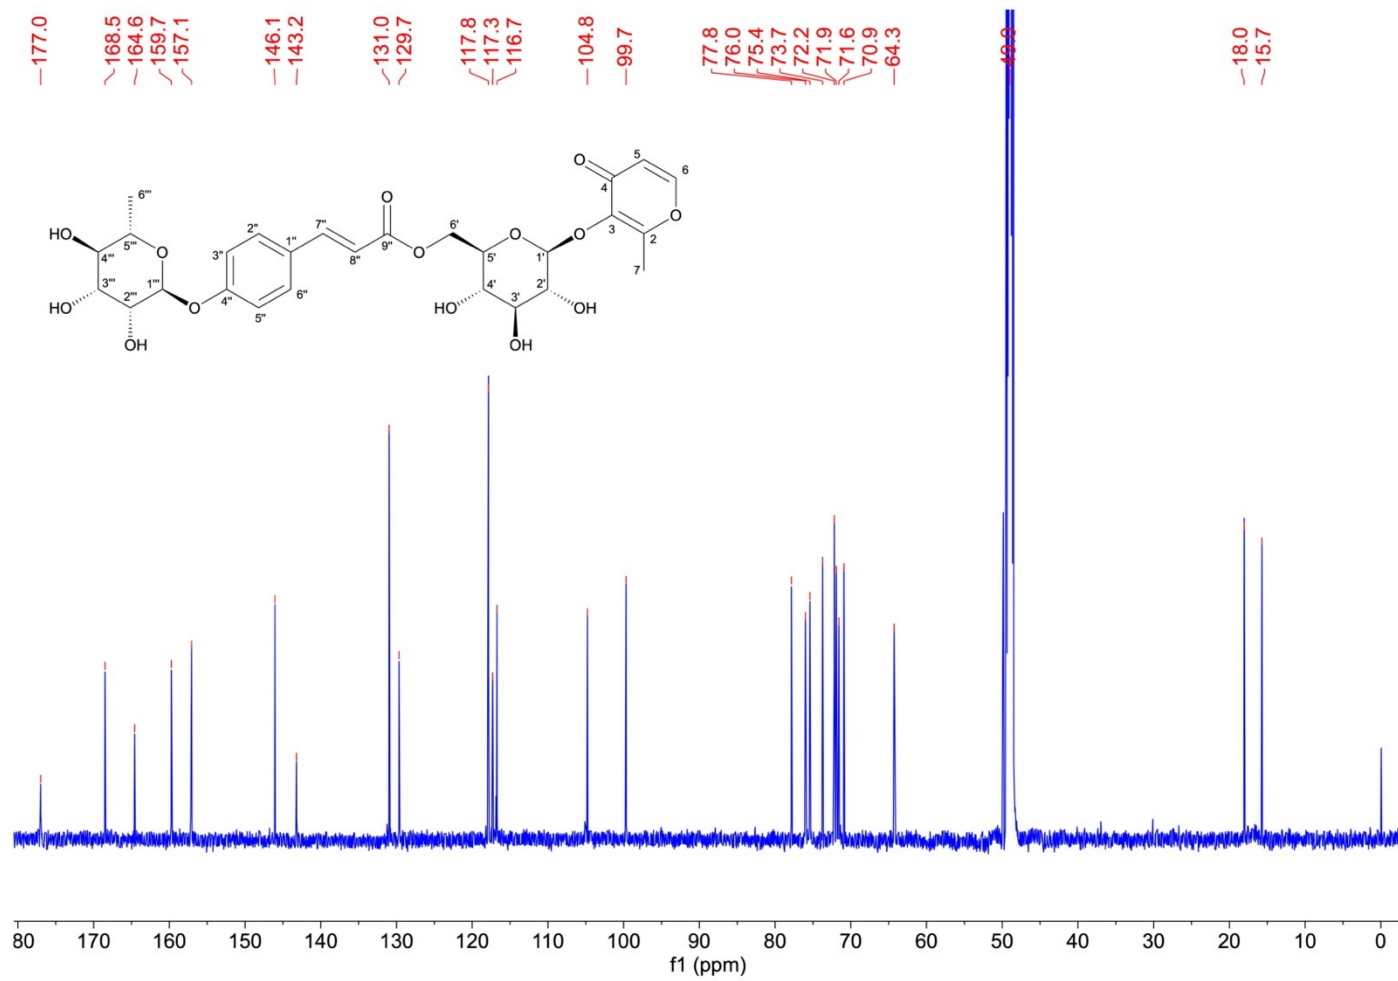

**Figure S4. Optical rotations of tunicoside B**

| Date                   | Time        | Measurement               | Unit          | Length of polarizer | Measure temperature      | Sample name         | Username             |
|------------------------|-------------|---------------------------|---------------|---------------------|--------------------------|---------------------|----------------------|
| 2021-06-21             | 21:33:27    | -168.331                  | [ $\alpha$ ]  | 0.5                 | 25.2                     | 4411                | 4411                 |
|                        |             | Original optical rotation | Concentration |                     | Temperature compensation | Compensation factor | Standard calibration |
|                        |             | -0.017                    | 0.020g/100mL  |                     | no                       |                     | no                   |
| Number of measurements | Measurement | Number of measurements    | Measurement   | Maximum value       | Minimum value            | Average value       | Mean square error    |
| 1                      | -159.960    | 6                         | -179.958      | -159.960            | -179.958                 | -168.331            | 7.5372               |
| 2                      | -170.035    |                           |               |                     |                          |                     |                      |
| 3                      | -159.960    |                           |               |                     |                          |                     |                      |
| 4                      | -170.035    |                           |               |                     |                          |                     |                      |
| 5                      | -170.035    |                           |               |                     |                          |                     |                      |

Figure S5. Ultraviolet (UV) spectra of tunicoside B

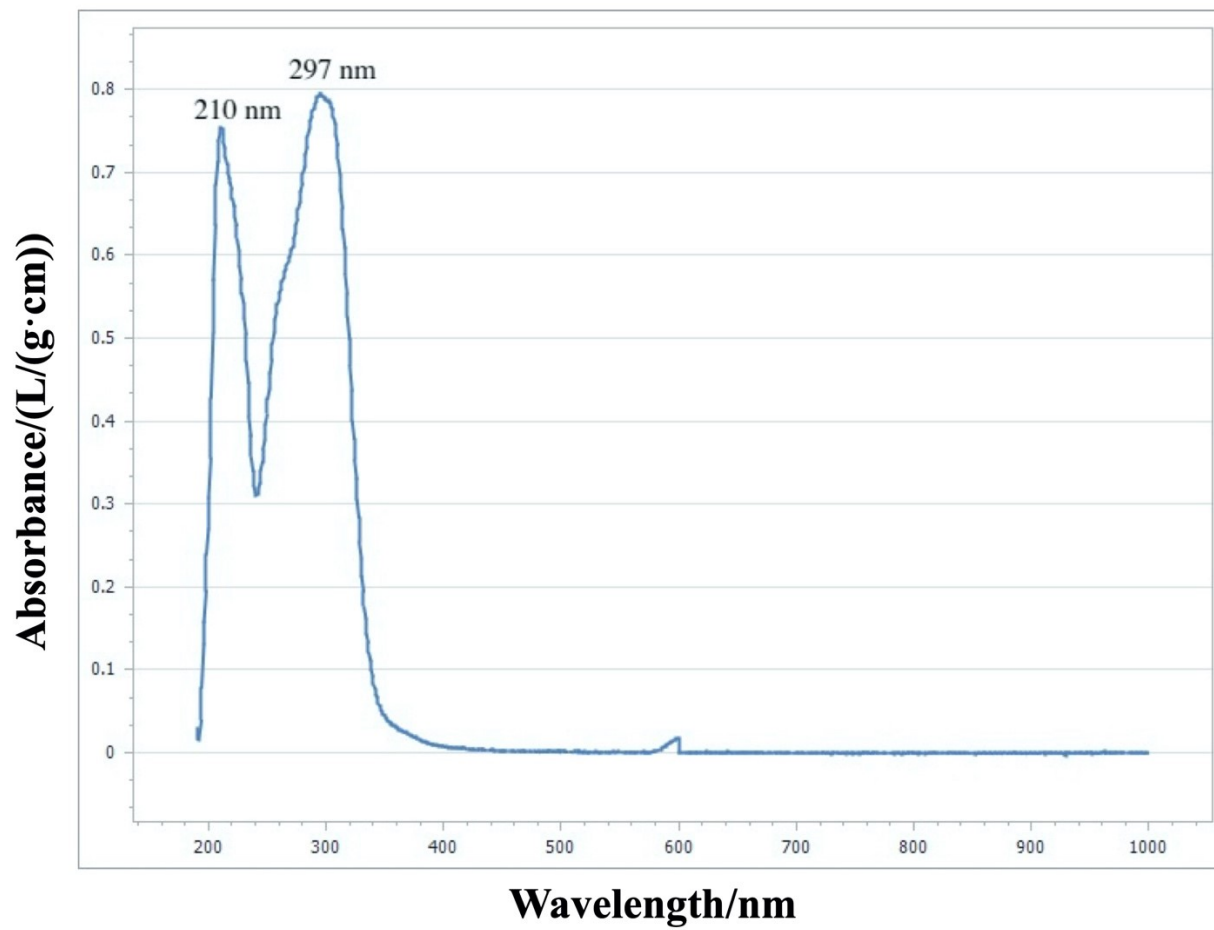

Figure S6. IR spectra of tunicoside B

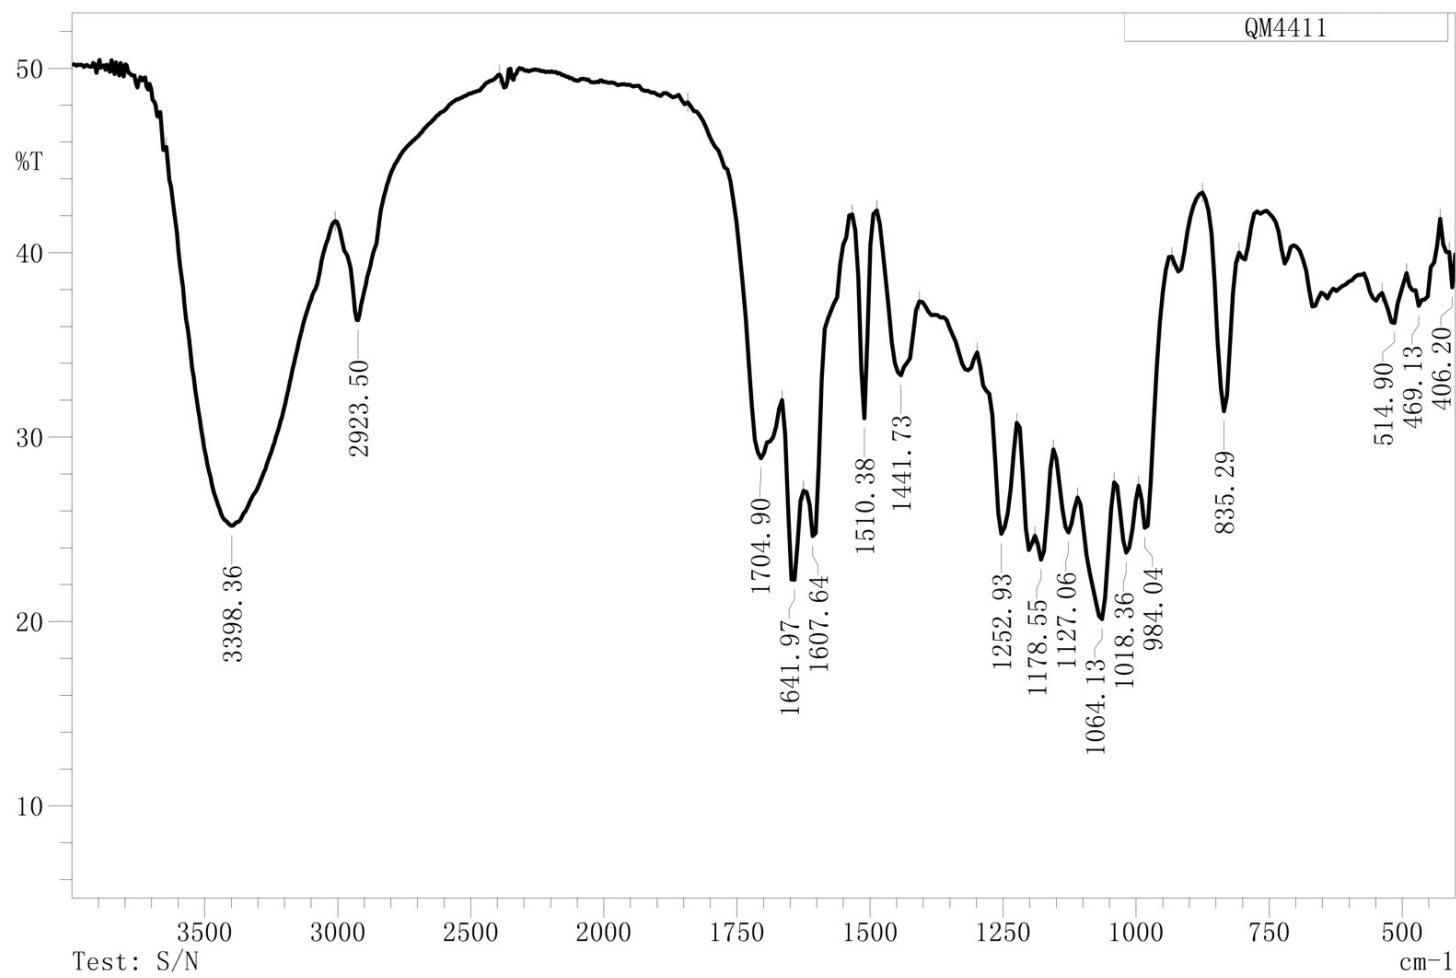



**Figure S7. The western blot images and the photographs of the corresponding pieces of membrane of iNOS (two independent experiments)**

1.

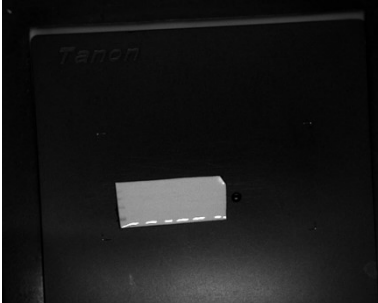

iNOS-membrane photograph in white light

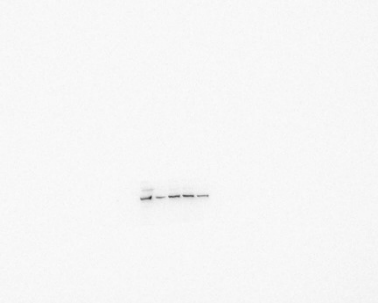

iNOS-exposure image in dark environment

2.

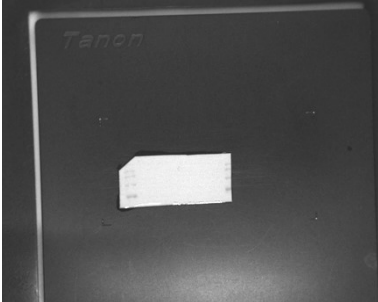

iNOS-membrane photograph in white light

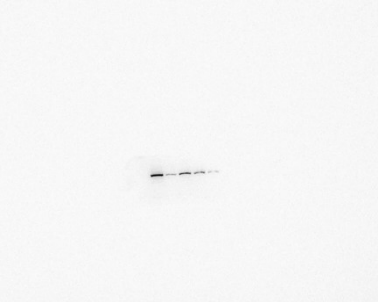

iNOS-exposure image in dark environment

**Figure S8. The western blot images and the photographs of the corresponding pieces of membrane of GAPDH (two independent experiments)**

1.

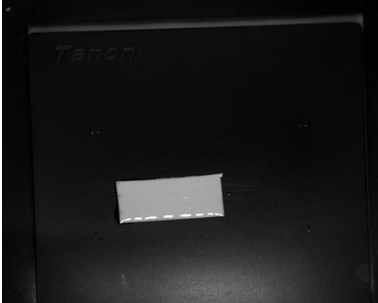

GAPDH-membrane photograph in white light

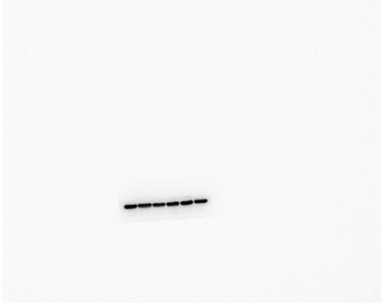

GAPDH-exposure image in dark environment

2.

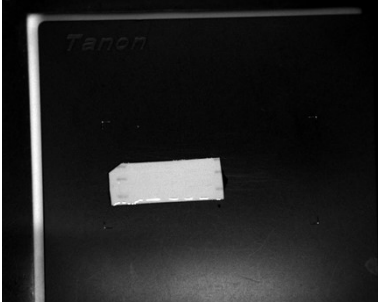

GAPDH-membrane photograph in white light

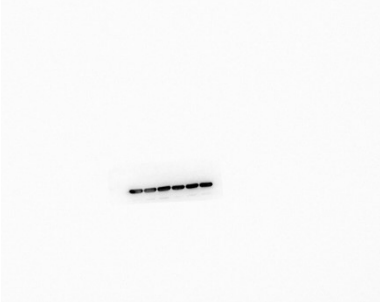

GAPDH-exposure image in dark environment
